# Supplementary material
Source: publisher figshare collection journal article supplement (https://acs.figshare.com/ndownloader/files/4642594)
Supplement: Supplementary file 1 [file 4642594]

## Supporting Information

### **First evidence of a functional interaction between DNA quadruplexes and Poly(ADP-ribose) polymerase-1**

*V.A. Soldatenkov<sup>2\*</sup>, A.A. Vetcher<sup>3†</sup>, T. Duka<sup>2</sup>, S. Ladame<sup>1\*</sup>*

*<sup>1</sup>Institut de Science et Ingénierie Supramoléculaires, Université Louis Pasteur - CNRS, 8 allée Gaspard Monge, 67083 Strasbourg, France*

*<sup>2</sup>Department of Radiation Medicine, Lombardi Comprehensive Cancer Center, Georgetown University Medical Center, 3970 Reservoir Rd, NW, Washington, DC 20007, USA*

*<sup>3</sup>National Center for Biodefense and Infectious Diseases, George Mason University, 10900 University Blvd, Manassas, VA 20110, USA*

*<sup>†</sup>Present address: AlfaGene BioSciences, Inc., Gaithersburg, MD 20877*

**Fluorescence titration experiments of a hPARP-1 solution with single-stranded DNA and three different quadruplexes (c-kit-1, c-kit-2 and Htelo).** To a 40 nM solution of hPARP-1 in 50 mM TRIS buffer pH 7.4 containing 100 mM KCl, 50  $\mu$ M Zn(OAc)<sub>2</sub> and 1 mM DTT was titrated in a solution of DNA (single-stranded or quadruplex) in buffer and the fluorescence of hPARP-1 tryptophans was recorded at 350 nm (when exciting at 295 nm). The plots of the fluorescence intensity vs DNA concentration are shown in Supplementary Figure 1 below.

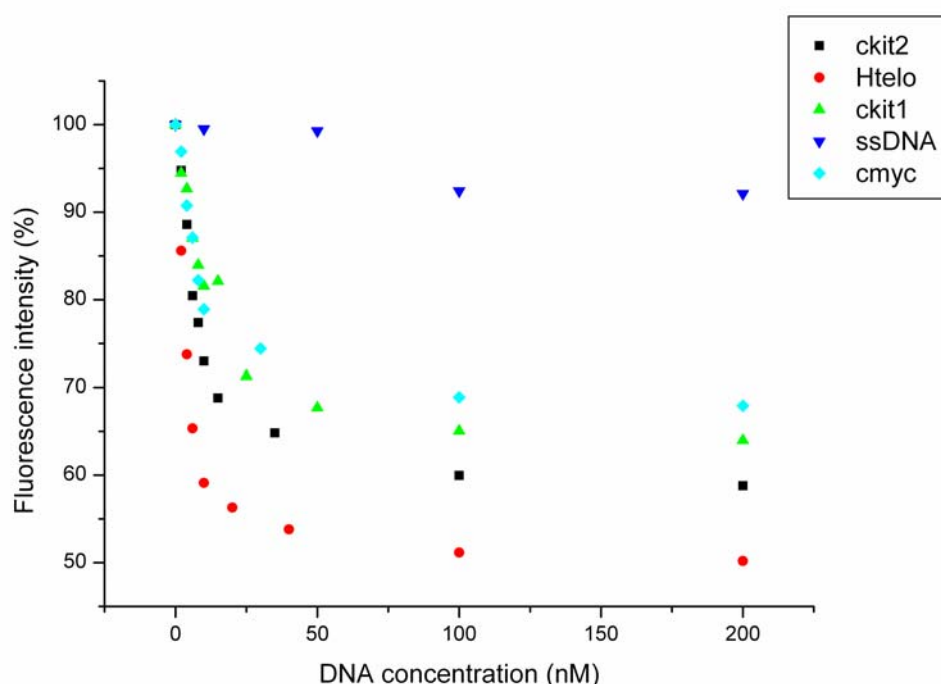

**Supplementary Figure 1** *Fluorescence titration experiment of hPARP-1 (40 nM) with intramolecular DNA quadruplexes and single-stranded DNA. A specific fluorescence quenching is observed with DNA quadruplexes.*

The oligonucleotides sequences used for these fluorescence titration experiments are as indicated below:

**c-kit-2:** AGG GAG GGC GCT GGG AGG AGG G

**Htelo:** GGG TTA GGG TTA GGG TTA GGG

**ss-DNA:** AGT GAG TGC TCT GTG AGG AGT G

**c-myc:** GGG TGG GGA GGG TGG G

### hPARP-1 activation upon binding to DNA quadruplexes and B-form duplex DNA ends.

hPARP-1 activity is known to be stimulated by different types of DNA ligands including both non-B DNA structures and DNA strand interruptions. Using the reaction of hPARP-1 auto-modification, we compared the co-enzymatic efficiency of a double stranded DNA break (B-form of DNA) with that of the c-kit-1 DNA quadruplexes (non-B DNA). Supplementary Figure 2 shows that quadruplex DNA is an equally potent hPARP-1 activator as a B-form duplex DNA end. These data are in line with previously reported observations on high co-enzymatic efficiency of other non-B DNA structures.

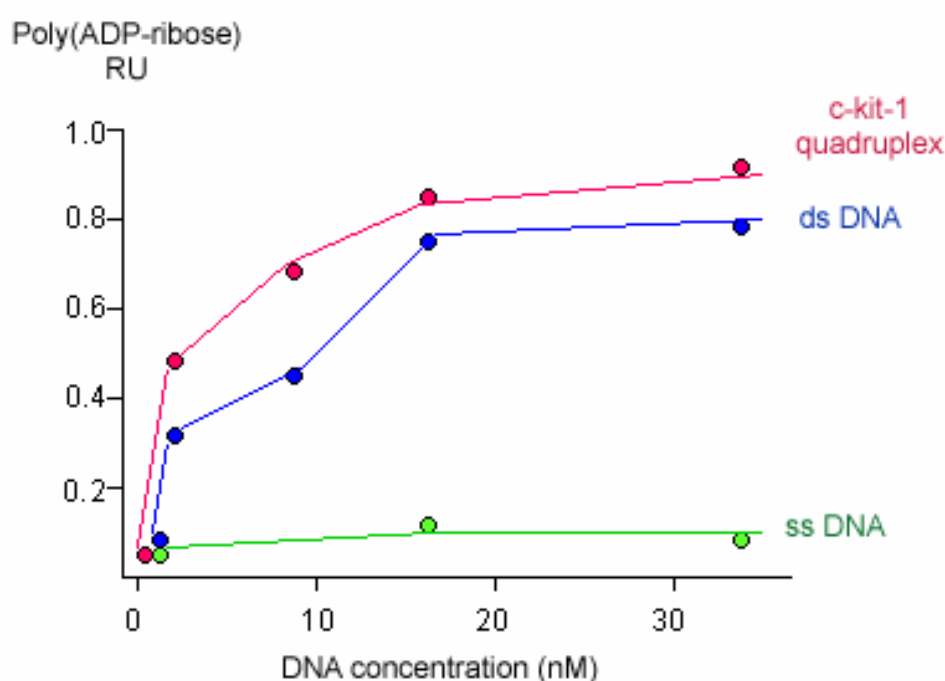

**Supplementary Figure 2.** *hPARP-1 enzymatic activation by c-kit-1 DNA quadruplexes and duplex DNA end.* The hPARP-1 auto-poly(ADP-ribosyl)ation reactions were carried out at fixed hPARP-1 protein concentration (10 nM) in the presence of 133  $\mu\text{M}$   $\text{NAD}^+$  and stimulated by increasing concentrations of either DNA quadruplex (**c-kit-1**), ssDNA oligonucleotide carrying mutated c-kit-1 sequence (**ssDNA**) to prevent quadruplex formation, or a linear ds DNA fragment (301-bp PvuII-PvuII fragment of pUC8) modified with streptavidin to carry only one dsDNA end unprotected as a single hPARP-1 binding site (see reference 27 from main text). The

extend of hPARP-1 auto-poly(ADP-ribosyl)ation was determined by Western blot analysis and the levels of poly(ADP-ribose) polymer (PAR) were quantified densitometrically (Epson 4870 photo, scion image program) and then normalized to the hPARP-1 protein content. Data are expressed in relative units of PAR levels of *in vitro* automodified PARP-1 standard (Trevigen), which was arbitrary set as 1.0.

**CD and UV characterization of the pS2 and iNOS quadruplexes.** Putative quadruplex forming sequences have been identified in the region of the promoters of the pS2 and iNOS genes. To demonstrate the capacity for these sequences to form G-quadruplexes *in vitro*, we have used CD and UV spectroscopy. The DNA sequences of both putative quadruplexes as well as the CD and UV spectra of a 5  $\mu$ M DNA solution are reported in Supplementary Figure 3 below.

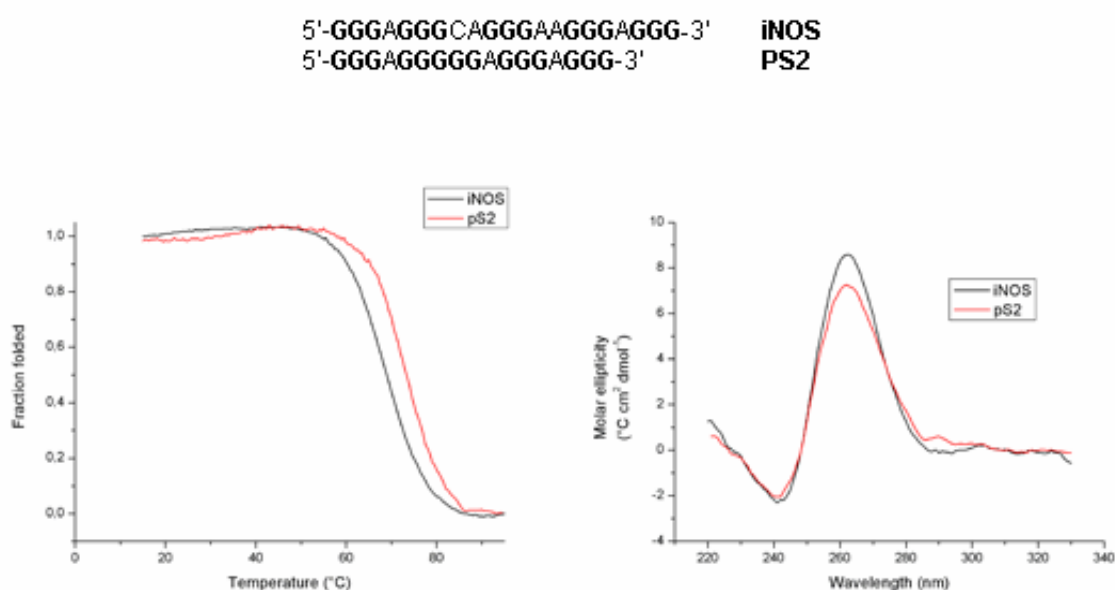

**Supplementary Figure 3** *Biophysical analyses of iNOS and pS2 promoter quadruplexes.* (top)

DNA sequences of iNOS and pS2 DNA quadruplexes. (bottom left) Melting UV profiles of iNOS and pS2 quadruplexes at 10  $\mu$ M strand concentration in 50 mM TRIS-HCl, pH 7.4 containing 100 mM KCl. (bottom right) CD spectra of iNOS and pS2 quadruplexes at 10  $\mu$ M strand concentration in 50 mM TRIS-HCl, pH 7.4 containing 100 mM KCl.

**hPARP-1 binding to the intramolecular human telomeric quadruplex.** In order to demonstrate that hPARP binding to the c-kit-1 quadruplex was not sequence specific but structure specific, we used SPR to measure the affinity of purified hPARP-1 for the intramolecular human telomeric quadruplex. The sensorgram overlay is reported in Supplementary Figure 4 below and show that hPARP-1 also binds Htelo although with a weaker affinity than c-kit-1.

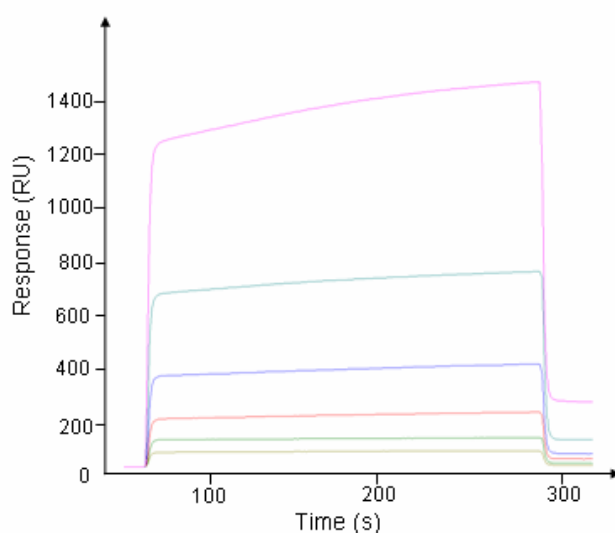

**Supplementary Figure 4** *hPARP-1 binds to the human telomeric quadruplex.* Sensorgram overlay for hPARP-1 binding to immobilized human telomeric quadruplex of sequence d(biotin-[GT<sub>2</sub>A(G<sub>3</sub>T<sub>2</sub>A)<sub>4</sub>G<sub>2</sub>]) at 6 different hPARP-1 concentrations (0.98 to 31.25 nM bottom to top)
